1           **Host poly(A) polymerases PAPD5 and PAPD7 provide two layers of**  
2           **protection that ensure the integrity and stability of hepatitis B virus RNA**

3    Fei Liu<sup>1\*</sup>, Amy C.H. Lee<sup>2</sup>, Fang Guo<sup>2</sup>, Andrew S. Kondratowicz<sup>2</sup>, Holly M. Micolochick Steuer<sup>1</sup>,  
4    Angela Miller<sup>2</sup>, Lauren D. Bailey<sup>2</sup>, Xiaohe Wang<sup>1</sup>, Shuai Chen<sup>1</sup>, Steven G. Kultgen<sup>1</sup>, Andrea  
5    Cuconati<sup>1</sup>, Andrew G. Cole<sup>1</sup>, Dimitar Gotchev<sup>1</sup>, Bruce D. Dorsey<sup>1</sup>, Rene Rijnbrand<sup>2</sup>, Angela M.  
6    Lam<sup>1</sup>, Michael J. Sofia<sup>1</sup>, Min Gao<sup>1\*</sup>

7

8    <sup>1</sup>Arbutus Biopharma, Warminster, Pennsylvania 18974, USA

9    <sup>2</sup>Were Arbutus employees at the time of data generation

10

11    \* Corresponding authors

12    Fei Liu, Email: [fliu@arbutusbio.com](mailto:fliu@arbutusbio.com); Min Gao, Email: [mgao@arbutusbio.com](mailto:mgao@arbutusbio.com)

13

14    **Key Words:** RNA integrity, RNA stability, PAPD5, PAPD7, HBV PRE and AB-452

15

16    **Conflict of interest**

17    The authors have declared that no conflict of interest exists.

18  
19  
20  
21  
22  
23  
24  
25  
26  
27  
28  
29  
30  
31  
32  
33  
34  
35  
36  
37

## Abstract

Noncanonical poly(A) polymerases PAPD5 and PAPD7 (PAPD5/7) stabilize HBV RNA via the interaction with the viral post-transcriptional regulatory element (PRE), representing new antiviral targets to control HBV RNA metabolism, HBsAg production and viral replication. Inhibitors targeting these proteins are being developed as antiviral therapies, therefore it is important to understand how PAPD5/7 coordinate to stabilize HBV RNA. Here, we utilized a potent small-molecule AB-452 as a chemical probe, along with genetic analyses to dissect the individual roles of PAPD5/7 in HBV RNA stability. AB-452 inhibits PAPD5/7 enzymatic activities and reduces HBsAg both *in vitro* ( $EC_{50}$  ranged from 1.4 to 6.8 nM) and *in vivo* by 0.93 log<sub>10</sub>. Our genetic studies demonstrate that the stem-loop alpha sequence within PRE is essential for both maintaining HBV poly(A) tail integrity and determining sensitivity towards the inhibitory effect of AB-452. Although neither single knock-out (KO) of *PAPD5* nor *PAPD7* reduces HBsAg RNA and protein production, *PAPD5* KO does impair poly(A) tail integrity and confers partial resistance to AB-452. In contrast, *PAPD7* KO could not result in any measurable phenotypic changes, but displays a similar antiviral effect as AB-452 treatment when *PAPD5* is depleted simultaneously. *PAPD5/7* double KO confers complete resistance to AB-452 treatment. Our results thus indicate that PAPD5 plays a dominant role in stabilizing viral RNA by protecting the integrity of its poly(A) tail, while PAPD7 serves as a second line of protection. These findings inform PAPD5 targeted therapeutic strategies and open avenues for further investigating PAPD5/7 in HBV replication.

## 38 **Importance**

39 Chronic hepatitis B affects more than 250 million patients and is a major public health concern  
40 worldwide. HBsAg plays a central role in maintaining HBV persistence and as such, therapies  
41 reducing HBsAg have been extensively investigated. PAPD5/7 targeting inhibitors, with oral  
42 bioavailability, represent an opportunity to reduce both HBV RNA and HBsAg. Here we uncover  
43 that the SL $\alpha$  sequence is required for HBV poly(A) tail integrity and RNA stability, and that the  
44 antiviral activity of AB-452 mimics the SL $\alpha$  mutants. Although PAPD5 and PAPD7 regulate HBV  
45 RNA stability, it remains unclear how they coordinate in stabilizing HBV RNA. Based on our  
46 studies, PAPD5 plays a dominant role to stabilize viral RNA by protecting the integrity of its  
47 poly(A) tail, while PAPD7 serves as a backup protection mechanism. Our studies may point out a  
48 direction towards developing PAPD5-selective inhibitors that could be used effectively to treat  
49 chronic hepatitis B.

50

51

## 52 **Introduction**

53 Globally, more than 250 million patients are chronically infected with hepatitis B virus (HBV)  
54 (World Health Organization), but a functional cure of chronic hepatitis B (CHB) is rarely achieved  
55 even after years of treatment with nucleos(t)ide analogues (NAs) such as entecavir (ETV) and  
56 tenofovir disoproxil fumarate (TDF)(1). Pegylated IFN- $\alpha$  enhances antiviral immune response, but  
57 the cure rate remains low and side effects are often difficult to tolerate (2, 3). The major obstacles  
58 to curing CHB include the persistence of the episomal covalently closed circular DNA (cccDNA),  
59 and an immune system that is tolerized to HBV, likely due to the excess amount of circulating  
60 Hepatitis B surface antigen (HBsAg) levels (4-6).

61 The HBV envelope proteins preS1, preS2 and HBsAg are synthesized in the endoplasmic  
62 reticulum and are secreted as both viral and subviral particles (7, 8). HBV virions are double-  
63 shelled particles with an outer lipoprotein bilayer containing the envelope proteins, and an inner  
64 nucleocapsid that encloses the HBV DNA and viral polymerase. The subviral particles devoid of  
65 nucleocapsids and HBV DNA (9, 10) are up to 100,000-fold in excess relative to the virions in the  
66 blood of infected patients (11). Such high levels of subviral particles are believed to play a key  
67 role in immune tolerance and maintenance of persistent HBV infection (5, 6). In patients with  
68 chronic hepatitis B, HBV-specific T cells are depleted or functionally impaired (12-15), and  
69 circulating and intrahepatic antiviral B cells are defective in the production of antibodies against  
70 HBsAg, with an expansion of atypical memory B cells (16, 17). HBsAg has also been linked to  
71 the inhibition of innate immunity and functionality of other immune cell types (18). Therefore,  
72 antiviral strategies that aim to target the HBV RNA transcripts could suppress HBsAg production  
73 and may break the immune tolerance state to potentially increase the functional cure rate.

74 Regulation of HBV RNA metabolism involves the post-transcriptional regulatory element (PRE),  
75 which is a stretch of ribonucleotides spanning positions 1151-1582 on the viral transcripts that is  
76 essential to HBV subgenomic RNA (sRNA) nuclear export and regulation of pregenomic RNA  
77 (pgRNA) splicing (19-22). The PRE contains three sub-elements, PRE $\alpha$ , PRE $\beta$ 1 and PRE $\beta$ 2. Each  
78 sub-element is sufficient to support sRNA nuclear export and HBsAg production, but all three  
79 together exhibit much greater activity (23, 24). The PRE is complexed with several RNA binding  
80 proteins, including T-cell intracellular antigen 1, La protein, polypyrimidine tract binding protein,  
81 ZC3H18 and ZCCHC14 (25-31). These PRE binding proteins may serve to regulate the export and  
82 stability of HBV RNAs. In particular, the CAGGC pentaloop sequence/structure of stem-loop  
83 alpha (SL $\alpha$ ) within the PRE $\alpha$  sub-element has been predicted to bind sterile-alpha-motif domain  
84 containing proteins (24). Recently, ZCCHC14 (a sterile-alpha-motif containing protein), together  
85 with PAPD5 and PAPD7 (the non-canonical poly(A) RNA polymerase associated domain  
86 containing proteins 5 and 7), were identified as the cellular binding proteins that interacted with  
87 the HBV SL $\alpha$  sequence (32).

88 The small-molecule compound, RG7834, targets PAPD5/7 and destabilizes HBV RNAs (33-36).  
89 Using a genome-wide CRISPR screen, it was subsequently observed that *ZCCHC14* and *PAPD5*  
90 were essential for the antiviral activity of RG7834 (31). Interestingly, individual knockdown of  
91 *PAPD5* or *PAPD7* had minimal effect against HBsAg production, while knockdown of *ZCCHC14*  
92 or double knockdown of *PAPD5/7* had a profound anti-HBsAg activity similar to that observed  
93 when cells were treated with RG7843 (31, 36). It was further demonstrated that double knockout  
94 of *PAPD5/7* reduced guanosine incorporation frequency within HBV RNA poly(A) tails, leading  
95 to a proposed model in which HBV RNA recruits the PAPD5/7-ZCCHC14 complex via the

96 CNGGN pentaloop of PRE SL $\alpha$  to enable the extension of mixed tailing on HBV poly(A) tails,  
97 which subsequently protects the viral RNAs from cellular poly(A) ribonucleases (32).

98 To gain further insights into how small-molecule inhibitors destabilize HBV RNAs, mechanistic  
99 studies were performed using AB-452, an analogue of RG7834, to evaluate its effect in HBV  
100 replicating cells and in cells transfected with constructs containing mutations within the PRE  
101 sequence. To better understand how PAPD5 and PAPD7 coordinate in the protection of HBV  
102 RNAs, both HBV RNA transcripts and their poly(A) tails were analyzed in cells with *PAPD5*  
103 and/or *PAPD7* knockout. Our results reveal that HBV utilizes two layers of protection mechanism  
104 provided by PAPD5 and PAPD7 to protect their poly(A) tail integrity and RNA stability.

105

106

## 107 **Results**

### 108 **AB-452 inhibits HBV *in vitro* and *in vivo*.**

109 AB-452 and RG7834 both belong to the dihydroquinolizinones chemical class. The antiviral  
110 activities of AB-452 and its diastereomer ARB-169451 were evaluated using multiple *in vitro*  
111 HBV replication models including HepG2.2.15 cells (constitutively express HBV through the  
112 integrated viral genome), PLC/PRF/5 cells (a patient-derived hepatocellular carcinoma cell line  
113 only expressing HBsAg), and HBV infected HepG2-NTCP cells or primary human hepatocytes  
114 (PHH) in which viral replication was dependent on cccDNA transcription (Table 1). AB-452  
115 reduced HBsAg, HBeAg, and HBV DNA production with EC<sub>50</sub> values ranging from 0.28 to 6.8  
116 nM, while its diastereomer ARB-169451 was more than 1,000-fold weaker towards HBsAg  
117 inhibition when compared to AB-452 (Table 1). AB-452 antiviral activity was specific for HBV  
118 as the compound was inactive against a panel of ten different RNA and DNA viruses with EC<sub>50</sub>  
119 values of >50 μM (Table S1). In addition, the cytotoxicity of AB-452 was evaluated in several cell  
120 lines from different tissue origins showing CC<sub>50</sub> values of >30 μM (the highest concentration  
121 tested) (Table S2), demonstrating the selectivity of AB-452.

122 To evaluate the effects of AB-452 against the different stages of the viral life cycle, HBV  
123 replication intermediates and viral proteins were analyzed from HepG2.2.15 cells treated with AB-  
124 452 at a concentration of 50-fold above its EC<sub>50</sub> value (Fig. 1). The nucleoside analog ETV and  
125 two classes of HBV capsid inhibitors GLS-4 (class I) and compound A (class II) (cmpdA chemical  
126 structure, Fig. S2) were included as controls targeting the polymerase and core/capsid proteins,  
127 respectively. ETV strongly inhibited HBV DNA replication, but it did not reduce other replication  
128 intermediates. Consistent with their mechanism of action, capsid inhibitors inhibited pgRNA

129 encapsidation and HBV DNA replication, but had no effect against total pgRNA and sRNA  
 130 transcripts. On the contrary, AB-452 displayed a unique antiviral phenotype reducing intracellular  
 131 pgRNA, sRNA, core protein, native capsids, encapsidated pgRNA, and replicating HBV DNA  
 132 (Fig. 1). Furthermore, the effect of AB-452 against intracellular pgRNA and sRNA was dose  
 133 dependent and reached a plateau starting at about 100 nM AB-452, with approximately 25%  
 134 pgRNA and 18% sRNA remaining detectable at the highest concentration tested (1  $\mu$ M) (Fig.  
 135 S3A). Results from the time course studies showed that AB-452 induced reduction of pgRNA and  
 136 sRNA starting at 8 h post treatment and the levels continued to decline through the 48 h treatment  
 137 period (Fig. S3B).

138 **Table 1. *In vitro* anti-HBV effect of AB-452 and ARB-169451**

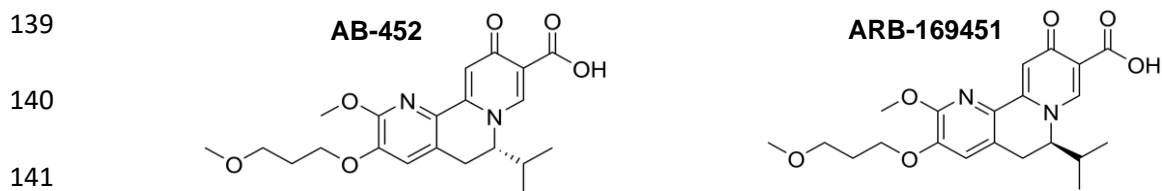

| HBV replication cells | HBV biomarkers | AB-452 EC <sub>50</sub> (nM)* | ARB-169451 EC <sub>50</sub> (nM)* |
|-----------------------|----------------|-------------------------------|-----------------------------------|
| HepG2.2.15            | HBsAg          | 1.4 ± 0.2                     | 2,233 ± 1,185                     |
|                       | HBcAg          | 2.8 ± 2.1                     | -                                 |
|                       | HBV DNA        | 0.28 ± 0.01                   | -                                 |
| HepG2/NTCP            | HBsAg          | 6.8 ± 1.8                     | -                                 |
|                       | HBcAg          | 4.0 ± 2.3                     | -                                 |
| PHH                   | HBsAg          | 3.0 ± 2.1                     | -                                 |
|                       | HBcAg          | 3.7 ± 1.3                     | -                                 |
|                       | HBV DNA        | 4.2 ± 3.8                     | -                                 |
| Alexander cells       | HBsAg          | 2.3 ± 0.36                    | >100                              |

142 \*Mean EC<sub>50</sub> ± standard deviations were determined from at least three independent experiments.



143 An AAV-HBV-transduced mouse model was used to assess the anti-HBV effect of AB-452 *in vivo*  
144 (Fig. S1). Compared to the vehicle control, oral administration of AB-452 for 7 days at 0.1, 0.3,  
145 and 1 mg/kg twice daily resulted in mean 0.68, 0.72 and 0.93 log<sub>10</sub> reduction of serum HBsAg  
146 (Fig. S1A) and mean 0.79, 1.16 and 0.94 log<sub>10</sub> reduction of serum HBV DNA (Fig. S1B),  
147 respectively. Inhibition of circulating HBV markers at 0.1, 0.3 and 1 mg/kg doses was found to be  
148 correlated with dose-dependent reductions of viral products in the liver: intrahepatic HBsAg levels  
149 were reduced by 64, 69 and 83% (Fig. S1C), intrahepatic total HBV RNA levels were reduced by  
150 35, 55, and 66%, and intrahepatic pgRNA levels were reduced by 43, 55, and 63% (Figs. S1D and  
151 S1E), respectively. AB-452 treatments were well-tolerated, with no significant change or reduction  
152 in body weight in mice throughout the course of the compound treatment compared to those  
153 receiving the vehicle control (Fig. S1F). The *in vitro* observation that AB-452 suppressed  
154 intracellular HBV RNA was therefore translatable to the *in vivo* AAV-HBV transduced mouse  
155 model when treated with AB-452.

156 **AB-452 promotes HBV RNA degradation through inhibiting PAPD5/7 and blocking**  
157 **guanosine incorporation within HBV poly(A) tails.**

158 To investigate the molecular mechanism of how AB-452 inhibits HBV RNA, studies were  
159 performed using HepAD38 cells in which HBV transcription is under tetracycline (Tet) regulation.  
160 Tet was first removed to induce transcription and accumulation of viral RNAs, and the capsid  
161 inhibitor GLS-4 was added to prevent pgRNA encapsidation. Six days later, Tet was added back  
162 to shut down further transcription and cells were treated with both GLS-4 and AB-452 for an  
163 additional 16 h. The effect of AB-452 on HBV transcripts was evaluated by collecting cells at 0,  
164 2, 4, 8 and 16 h post treatment, and decay of the transcribed HBV RNA was monitored by Northern  
165 blot analysis. In the absence of AB-452, HBV RNA levels reduced over time due to natural decay

166 (Fig. 2A). In the presence of AB-452, both pgRNA and sRNA exhibited faster migration starting  
167 at 2 h post-treatment and their levels were significantly reduced at 8 and 16 h post-treatment (Fig.  
168 2A). Determination of the pgRNA half-lives ( $T_{1/2}$ ) showed that AB-452 treatment reduced the  $T_{1/2}$   
169 values from 4.5 h to 2.4 h compared to those from untreated cells (Fig. 2B).

170 Destabilization of HBV RNA by RG7834 was reported to be mediated through inhibiting the  
171 PAPD5 and PAPD7 proteins (31, 36). We determined the effect of AB-452 on the enzymatic  
172 activity of recombinant PAPD5 and PAPD7 using an ATP depletion biochemical assay (Fig. 2C).  
173 Results showed that AB-452 efficiently inhibited PAPD5 with an  $IC_{50}$  of 94 nM (Fig. 2C). RG7834  
174 also inhibited PAPD5, although the potency ( $IC_{50} = 167$  nM) was lower than previously reported  
175 ( $IC_{50} = 1.3$  nM) (31), possibly due to the more truncated PAPD5 form that was used in the current  
176 study. AB-452 and RG7834 inhibited PAPD7 enzymatic activity with  $IC_{50}$  values of 498 nM and  
177 1093 nM, respectively. In contrast, the enantiomer ARB-169451 was unable to effectively inhibit  
178 PAPD5 ( $IC_{50} = 27,000$  nM) or PAPD7 ( $IC_{50} > 50,000$  nM) (Fig. 2C).

179 RNA metabolism in most eukaryotic mRNAs employs the 3' deadenylation pathway, in which  
180 poly(A) tail shortening is often observed prior to mRNA degradation (37-39). We therefore  
181 determined the HBV poly(A) tail length and composition from HepAD38 cells in the presence or  
182 absence of AB-452. To amplify the HBV poly(A) tail, G/I (guanosine and inosine nucleotides)  
183 tailing was added to the 3'-ends of mRNA transcripts and the newly added G/I tails were used as  
184 the priming sites to synthesize the cDNA that would be used for amplification of HBV poly(A)  
185 tails. The lengths and compositions of the amplicons containing the HBV RNA poly(A) tails were  
186 analyzed by next generation sequencing (PacBio Sequel Sequencing platform). Results showed  
187 that majority of the HBV poly(A) tails from untreated samples ranged between 50 to 200  
188 nucleotides in length, with an average tail length of around 100 nucleotides. In contrast, AB-452

189 treatment reduced the HBV RNA poly(A) tail length by almost 50%, to an average of 58  
190 nucleotides (Fig. 2D and Table S3). The poly(A) tails amplified from  $\beta$ -actin cDNAs served as the  
191 negative control, which was not responsive to the treatment (Fig. S4).

192 It was recently reported that PAPD5/7 extended HBV mRNA poly(A) tails with intermittent  
193 guanosine (G), and the incorporation of G could shield them from rapid de-adenylation by cellular  
194 deadenylases (32). Since AB-452 inhibited PAPD5/7 enzymatic activities and shortened poly(A)  
195 tail lengths, we therefore hypothesized that the G content within the HBV poly(A) tails would be  
196 affected by AB-452 treatment. Quantification of the non-adenosine nucleosides within the HBV  
197 poly(A) tails indeed revealed that the frequency of G was significantly reduced in the presence of  
198 AB-452 (Fig. 2E). The fraction of poly(A) tails containing internal G was reduced from 64% to  
199 25% in the presence of AB-452 compared to those from untreated HepAD38 cells (Fig. 2F). Taken  
200 together, the data indicate that inhibition of PAPD5/7 by AB-452 led to blockage of G  
201 incorporation and shortening of the poly(A) tail.

#### 202 **SL $\alpha$ within the PRE sequence is required for HBV RNA integrity and AB-452 susceptibility.**

203 We and others have determined that reduction of HBV RNA by RG7834 is dependent on the HBV  
204 PRE (31, 32, 35), which partially overlapped with the HBx coding region. To further define the  
205 involvement of the sub-elements within PRE on HBV RNA stability and AB-452 susceptibility,  
206 several reporter plasmids were constructed (Fig. 3A): 1) H133 is the wild type construct supporting  
207 the expression of 2.1 kb HBV sRNA expression, 2) H133\_Gluc is derived from H133 but with the  
208 HBsAg coding sequence replaced with *Gaussia* luciferase, 3) Gluc\_dHBx is derived from  
209 H133\_Gluc but with most of the HBx coding sequence deleted (nucleotide 1389 to 1991) and the

210 HBV poly(A) replaced with the SV40 poly(A) signal, and 4) Gluc\_rcSL $\alpha$  is derived from  
211 Gluc\_dHBx with an inverted SL $\alpha$  sequence.

212 AB-452, but not its enantiomer ARB-1694151, inhibited both HBsAg and Gluc expression in cells  
213 transfected with H133 (EC<sub>50</sub> = 2.5 nM), H133\_Gluc (EC<sub>50</sub> = 10.0 nM), or the Gluc\_dHBx  
214 construct (EC<sub>50</sub> = 4.2 nM) (Fig. 3A). These data indicate that AB-452 antiviral activity was not  
215 dependent on the HBsAg sequence, HBx sequence or the HBV poly(A) signal sequence. On the  
216 other hand, inverting the SL $\alpha$  sequence (Gluc\_rcSL $\alpha$ ) completely abolished sensitivity to AB-452  
217 (EC<sub>50</sub> >100 nM) (Fig. 3A and 3B). Interestingly, we observed that the transcribed RNA from the  
218 Gluc\_rcSL $\alpha$  transfected cells showed reduction in RNA levels and appeared smaller in size when  
219 compared to the RNA from cells transfected with the Gluc\_dHBx plasmid, with or without AB-  
220 452 treatment (Fig. 3B). The rates of HBV RNA decay revealed that AB-452 treatment reduced  
221 Gluc\_dHBx RNA half-lives (T<sub>1/2</sub>) from 10 h to 5.1 h when compared to DMSO treated cells (Fig.  
222 3C). In contrast, the Gluc\_rcSL $\alpha$  RNA was unstable (T<sub>1/2</sub> = 5.6 h) and its T<sub>1/2</sub> was only slightly  
223 reduced by AB-452 (T<sub>1/2</sub> = 4.2 h) (Fig. 3C).

224 In addition to SL $\alpha$ , HBV PRE $\alpha$  contains another cis-acting element known as La protein binding  
225 element, these two cis-acting elements were included in a 109 nucleotides sequence that was  
226 critical for RG7834 sensitivity (35). The requirement of these two elements was studied by  
227 generating two additional H133 derived constructs, H133\_dSL $\alpha$  and H133\_dLa, in which the SL $\alpha$   
228 sequence and the La element was deleted, respectively. AB-452 inhibited HBsAg production in  
229 H133\_dLa transfected cells with similar efficiencies as the wildtype H133 construct (EC<sub>50</sub> = 4.3  
230 and 2.5 nM, respectively), indicating that the La protein binding element was not essential for  
231 susceptibility to AB-452. Alike to the results observed in the Gluc\_rcSL $\alpha$  transfection, AB-452  
232 was inactive against the H133\_dSL $\alpha$  (EC<sub>50</sub> >100 nM) (Fig. 4A, Fig. S5). Deleting the SL $\alpha$

233 sequence also led to the shortening and reduction of sRNA level (Fig. 4B), as well as reduced  
234 transcripts  $T_{1/2}$  (Fig. 4C). Cells transfected with H133\_dSL $\alpha$  showed reduced sensitivity to AB-  
235 452, with transcript half-life being only slightly reduced from 6.2 h to 5.5 h when compared to  
236 those treated with DMSO (Fig. 4C).

237 NGS analysis of the sRNA poly(A) tails showed that AB-452 reduced the average poly(A) tail  
238 length of H133 transcripts from 124 to 64 nucleotides (Fig. 4D). The poly(A) tails from the  
239 H133\_dSL $\alpha$  transcripts were 62 and 71 nucleotides with and without AB-452 treatment,  
240 respectively (Fig. 4D). In terms of the poly(A) tail composition, the guanylation frequency was  
241 highest in cells transfected with the wildtype PRE (H133), and the overall guanylation frequency  
242 was reduced from about 60% to 24% in the presence of AB-452 (Fig. 4E and 4F). In contrast, the  
243 guanylation frequency in the H133\_dSL $\alpha$  transcripts already appeared low (22% to 27%) with and  
244 without AB-452 treatment (Figs. 4E and 4F). Taken together, these data provide first line evidence  
245 demonstrating that the SL $\alpha$  sequence serves to stabilize the viral transcripts through maintaining  
246 the poly(A) tail lengths and mixed-nucleotides composition.

#### 247 **PAPD5 and PAPD7 determine HBV RNA integrity and stability.**

248 To understand the individual role of PAPD5 and PAPD7 in regulating HBV RNA stability and  
249 poly(A) tail integrity, knockout (KO) cell lines with deletion of *PAPD5* (*P5\_KO*), *PAPD7*  
250 (*P7\_KO*), or both *PAPD5/7* (double knockout, *P5/7\_DKO*) were isolated using CRISPR-Cas9  
251 gene editing and HepG2-NTCP cells. It was reported that ZCCHC14 (Z14), which interacts with  
252 PAPD5/7 and the HBV PRE, plays an important role in maintaining HBV RNA integrity and  
253 stability (32). *Z14* KO cell lines (*Z14\_KO*) were generated to assess the involvement of Z14 on  
254 regulating HBV RNA. In addition to the parental wildtype (WT) HepG2-NTCP cell line, two  
255 additional WT cell clones (T3-4 and T2-14) were included as clonal controls. The full-allelic KO

256 genotype for all the individual cell clones was confirmed by DNA sequencing (Fig. S7A), and  
257 *PAPD5* and *Z14* knockout were also confirmed at the protein level (Fig. S7B). *PAPD7* protein  
258 expression could not be evaluated by Western blot due to the lack of an efficient *PAPD7* specific  
259 antibody, but the *PAPD7* KO genotype was confirmed by DNA sequencing (Fig. S7A).

260 Overall, cell proliferation analysis suggests that *PAPD5*, *PAPD7*, and *Z14* were not critical for cell  
261 survival (Fig. 5A). The effect of knocking out *PAPD5/7* and *Z14* on viral protein production and  
262 HBV replication was examined by using two independent systems: adenovirus-encoded HBsAg  
263 transduction and HBV infection (Figs. 5B-C). In the adenovirus transduction studies, single KO  
264 of *PAPD5* or *PAPD7* did not reduce HBV replication or antigens production compared to the  
265 parental cell clones. HBsAg expression in the *P5/7\_DKO* and *Z14\_KO* clones was about 50%  
266 lower than that of the WT or *PAPD5/7* single KO clones in the 5 days culture (Fig. 5B). In the  
267 HBV infection studies, the levels of viral proteins and HBV DNA were much lower in the  
268 *P5/7\_DKO* and *Z14\_KO* clones compared to the WT or *PAPD5/7* single KO clones in the 9 days  
269 culture (Fig. 5C).

270  
271 We next examined the impact of deleting *PAPD5*, *PAPD7*, *Z14*, or both *PAPD5/7* on compound  
272 sensitivity. In adenovirus transduced cells, AB-452 inhibited HBsAg production from WT and  
273 *P7\_KO* cells with similar  $EC_{50}$  values of 9 nM and 10 nM, respectively. However, AB-452 was  
274 about 7-fold less active against the *P5\_KO* cells ( $EC_{50} = 72$  nM) (Table 2). Susceptibility to AB-  
275 452 was also evaluated using HBV infected HepG2-NTCP cells: results showed that AB-452  
276 inhibited WT and *P7\_KO* cells with similar efficiencies ( $EC_{50}$  values of 11 nM and 9 nM,  
277 respectively), but was again less active against the *P5\_KO* cells ( $EC_{50} = 85$  nM) (Table 2). A  
278 similar trend was also observed with RG7834, suggesting this differentiated antiviral activity was

279 not AB-452 specific. The antiviral data are consistent with the finding that AB-452 and RG7834  
 280 were more efficient against PAPD5 than PAPD7 in the enzymatic assays (Fig. 2C). Among the  
 281 *P5/7\_DKO* and *ZI4\_KO* cell lines, AB-452 treatment did not show further inhibition compared to  
 282 the untreated controls (Figs. 5D to 5G).

283 **Table 2. Anti-HBV effect of AB-452 and RG7834 in *PAPD5* or *PAPD7* KO cell lines**

| Cell lines           | Compound | Adeno infection       |           | HBV infection         |          |
|----------------------|----------|-----------------------|-----------|-----------------------|----------|
|                      |          | EC <sub>50</sub> (nM) | #FC vs WT | EC <sub>50</sub> (nM) | FC vs WT |
| WT (parent)          | AB-452   | 9.0 ± 4.6             | 1         | 2.7 ± 1.8             | 1        |
|                      | RG7834   | 11.8 ± 9.6            | 1         | -                     | -        |
| <i>P5_KO</i> (T3-4)  | AB-452   | 71.6 ± 31.2           | 8.0       | 37.7 ± 8.3            | 14.0     |
|                      | RG7834   | 126 ± 74.7            | 10.7      | -                     | -        |
| <i>P5_KO</i> (T3-15) | AB-452   | 56.0 ± 34.0           | 6.3       | 39.3 ± 3.2            | 14.6     |
|                      | RG7834   | 85.7 ± 59.8           | 7.3       | -                     | -        |
| <i>P7_KO</i> (T2-8)  | AB-452   | 10.0 ± 1.0            | 1.1       | 3.8 ± 1.5             | 1.4      |
|                      | RG7834   | 23.7 ± 15.2           | 2.0       | -                     | -        |
| <i>P7_KO</i> (T2-22) | AB-452   | 7.1 ± 1.3             | 0.8       | 3.2 ± 1.9             | 1.2      |
|                      | RG7834   | 10.8 ± 2.1            | 0.9       | -                     | -        |

284 Mean EC<sub>50</sub> ± standard deviations were determined from three independent experiments. #FC:  
 285 fold change.

286

287 Interestingly, while there was no appreciative reduction of HBV protein and DNA production  
 288 observed from the *P5\_KO* cells (Figs. 5B-C), we noted that the sRNA migrated faster than those  
 289 from the WT and *P7\_KO* cells (Fig 5H). Intrigued by this observation, the sRNA from WT and

290 the various KO cells were further characterized by NGS analysis. Results revealed that knocking  
291 out *PAPD5* alone, but not *PAPD7*, reduced both the poly(A) tail lengths (from >136 bp to 94 bp)  
292 and guanylation frequency of sRNA (from ~50% to 30%) when compared to the WT cells (Figs.  
293 5I, 5J and S8, and Table S5). AB-452 treatment led to reduction of poly(A) tail length (from >136  
294 bp to ~60 bp) and guanylation (from ~50% to ~10%) in both WT and *P7\_KO* cells. The *P5\_KO*  
295 cells appeared less sensitive to AB-452 in its shortening of poly(A) tail lengths and guanosine  
296 incorporation. Cells with *Z14\_KO* and *PAPD5/7\_DKO* already showed drastically reduced levels  
297 of sRNA, poly(A) tail lengths (51 - 58 bp) and guanosine incorporation (~10%), with and without  
298 AB-452 treatment. Taken together, these results suggest that of the two noncanonical poly(A)  
299 polymerases, *PAPD5* appeared to play a major role in determining viral poly(A) tail integrity,  
300 guanosine incorporation and AB-452 sensitivity.

301

## 302 **Discussion**

303 Current therapies for chronic hepatitis B patients rarely achieve functional cure, which is  
304 characterized as sustained loss of HBsAg with or without HBsAg antibody seroconversion (40).  
305 The discovery of RG7834 has raised significant interest as this class of small-molecule inhibitors  
306 has the potential to reduce both HBV RNA and viral proteins, which are distinct from direct-acting  
307 antivirals targeting the HBV polymerase and capsid proteins (31, 36). AB-452 is an analog of  
308 RG7834 with a similarly broad antiviral effect against multiple HBV replication intermediates. It  
309 has been appreciated that integrated HBV DNA is a major source of HBsAg expression in HBeAg  
310 negative patients (41). Our data indicate that AB-452 can reduce HBsAg produced from cccDNA  
311 in HBV-infected cells as well as from integrated HBV DNA in patient-derived hepatocellular



312 carcinoma cells (Table 1). Furthermore, oral administration of AB-452 substantially reduced HBV  
313 DNA, HBsAg, HBeAg, and intrahepatic HBV RNA from AAV-HBV-infected mice. Our studies  
314 here provide insights into the mode of action for AB-452 and further characterize the RNA  
315 stabilization mechanisms utilized by the virus. Our results demonstrate that the cis-acting SL $\alpha$   
316 viral sequence and the trans-acting host factors PAPD5 and PAPD7 coordinate to protect viral  
317 RNA. Interference of such viral-host interactions through small-molecule compounds treatment or  
318 genetic mutations led to destabilization of viral transcripts and reduction of HBsAg.

319 The requirement of PAPD5/7 and ZCCHC14 to form a complex with HBV RNA through the PRE  
320 element for stabilizing HBV RNA has been described (31, 32). Since the ZCCHC14/PAPD5/7  
321 complex is recruited onto the SL $\alpha$  sequence, it is conceivable that mutating the SL $\alpha$  sequence may  
322 disrupt the binding of the ZCCHC14/PAPD5/7 complex and consequently affect HBV RNA  
323 stability. Here, our studies provided the genetic evidence that an intact SL $\alpha$  sequence is indeed  
324 critical for maintaining HBV poly(A) tail integrity and stability, as inverting or deleting this  
325 sequence both destabilize HBV RNA. Notably, the phenotype of the SL $\alpha$  deletion and inversion  
326 mutants resembled the antiviral effect of AB-452: cells treated with AB-452 display the  
327 phenotypes of HBV poly(A) tail shortening, reduced guanosine incorporation, and HBV RNA  
328 degradation.

329 Initial studies suggest that PAPD5 and PAPD7 may provide redundant if not identical role(s) in  
330 protecting HBV RNA stability (31, 32, 36, 42). However, our results from the *P5\_KO* and *P7\_KO*  
331 cell lines would argue that PAPD5 and PAPD7 may serve two lines of protection in maintaining  
332 the stability of HBV RNA. *P5\_KO*, but not *P7\_KO*, impaired poly(A) tail integrity. Moreover, the  
333 phenotypic measurements we monitored so far indicate that the *P7\_KO* cells were similar to WT  
334 cells, further supporting that PAPD5 expression alone could support viral RNA integrity and

335 stabilization (Fig. 5). These data suggest that PAPD7 did not actively contribute to HBV RNA  
336 protection in the presence of PAPD5, but instead served as a second line of protection by  
337 moderately extending HBV poly(A) tail when PAPD5 was depleted (Figs. 5I and 5J). Results from  
338 the enzymatic assays show that PAPD5 was more robust than PAPD7 in the extension of poly(A)  
339 tails (Fig. S9), supporting our argument that PAPD5 would be the major host factor in protecting  
340 HBV RNA. Immune precipitation experiments conducted by two independent research groups  
341 indicated that both PAPD5 and PAPD7 were bound to HBV mRNA, with PAPD7 at a lower level  
342 compared to PAPD5(32, 42). Further studies would be required to clarify the role of PAPD7 in  
343 HBV RNA metabolism in WT cells.

344 Another noteworthy observation from this study is that the two HBV RNA destabilizers, AB-452  
345 and RG7834, displayed different inhibitory efficiencies against PAPD5 and PAPD7. Both  
346 compounds were 5- to 7-fold less efficient against the enzymatic activities of PAPD7 compared to  
347 PAPD5, which was in turn consistent with the results from cell-based studies in which AB-452  
348 and RG7834 displayed a 5- to 10-fold reduction in activities against HBsAg production in the  
349 *P5\_KO* cells (in which PAPD7 is present) when compared to those from the WT and *P7\_KO* cells  
350 (in which PAPD5 is present). These data suggest that it may not be critical to completely inhibit  
351 PAPD7 to achieve HBV RNA destabilization. However, not all HBV RNA destabilizers  
352 differentiate between PAPD5 and PAPD7, as compounds from another chemical class showed no  
353 discrimination between PAPD5 and PAPD7 (manuscript in preparation). These data, together with  
354 the genetic studies, support the hypothesis that PAPD5 could be more essential than PAPD7 in  
355 stabilizing HBV RNA. Our results further suggest that developing PAPD5-selective inhibitors of  
356 HBV replication could be pharmacologically feasible.

357 Here, we propose a working model of the interplay between HBV transcripts and the cellular  
358 ZCCHC14/PAPD5/7 RNA metabolism machineries (Fig. 6). Maintenance of HBV RNA stability  
359 is a dynamic process regulated by canonical and non-canonical poly(A) polymerases and  
360 deadenylases. PAPD5 could form a complex with ZCCHC14, which directs the non-canonical  
361 polymerase onto the viral transcripts through the SL $\alpha$  within the HBV PRE sequence. Assembly  
362 of the ZCCHC14/PAPD5 onto SL $\alpha$  within the HBV PRE sequence facilitates the addition of G  
363 while extending the poly(A) tail. This guanylation process may stall the cellular poly(A)  
364 exonuclease and terminate further deadenylation, thus protecting the RNA from degradation.  
365 When PAPD5 is depleted, ZCCHC14/PAPD7 complex may bind to HBV RNA and protects its  
366 degradation, however PAPD7 is less effective for poly(A) extension and guanylation  
367 incorporation. When HBV is challenged by PRE mutations or HBV RNA destabilizers such as  
368 AB-452, viral RNA integrity and stability are disrupted due to disarraying or inhibition of the  
369 ZCCHC14/PAPD5/7 complex from interacting with the SL $\alpha$  sequence.

370

### 371 **Funding**

372 This study was sponsored by Arbutus Biopharma.

## 373 **Methods and materials**

374 Detailed methods and materials are provided in the online Supporting information of this paper.

### 375 **Cell lines and culture**

376 HepG2.2.15, HepAD38, HepDE19 cells and PLC/PRF/5 cells were cultured in DMEM/F12  
377 medium (Corning, NY, USA), supplemented with 10% fetal bovine serum (Gemini, CA, USA),  
378 100 U/ml penicillin and 100 µg/ml streptomycin. Huh-7 cells (Creative Bioarray, NY, USA) were  
379 cultured in RPMI 1640 medium (Basel, Switzerland) containing 10% fetal bovine serum 100 U/ml  
380 penicillin and 100 µg/ml streptomycin. HepG2-hNTCP-C4 cells were cultured in DMEM medium  
381 (Gibco™, MA, USA) containing 10% fetal bovine serum and 10 mM HEPES (Gibco™). *PAPD5*,  
382 *PAPD7* and *ZCCHC14* were knocked out in the HepG2-hNTCP-C4 cells by using CRISPR  
383 technology at GenScript (Piscataway, NJ). Briefly, HepG2-hNTCP-C4 cells were transfected with  
384 gRNA and Cas9 expression plasmids. Single cell clones were generated and confirmed by Sanger  
385 sequencing (S5A Fig.). The obtained clones were expanded and further evaluated by the Western  
386 blots (S5B Fig.). The gRNA sequences are listed as follows: *PAPD5* gRNA 5'-  
387 GACATCGACCTAGTGGTGGTTTGG-3', *PAPD7* gRNA 5'-ATATTTGGCA GCT  
388 TTAGTACAGG-3', and *ZCCHC14* gRNA 5'-GCGTGAGACCCGCACCCCG-3'.

### 389 **Measurement of extracellular HBsAg, hepatitis B e antigen (HBeAg) and HBV DNA**

390 HBsAg and HBeAg from the supernatants of cultured HepG2.2.15 cells (43) were measured using  
391 the chemiluminescence-based immunoassay per manufacturer's instructions (AutoBio  
392 Diagnostics Co, China). Secreted HBV DNA was extracted according to manufacturer provided  
393 protocol (Realtime Ready Cell Lysis Kit, Roche, Mannheim, Germany) and quantified in a qPCR

394 assay (LightCycler® 480 SYBR Green I Master, Roche) with the 5'-GGCTTTCGGAAAATTCC  
395 TATG-3' (sense) and 5'-AGCCCTACGAACCACTGAAC-3' (antisense) primers using the PCR  
396 conditions of denaturing at 95 °C for 5 min, followed by 40 cycles of amplification at 95 °C for  
397 15 s and 60 °C for 30 s.

### 398 **PRE cis-elements analysis**

399 Constructs containing either HBsAg or the Gaussia luciferase reporter genes were synthesized  
400 (GenScript). The H133 encodes the full HBsAg transcript sequence (spanning nt 2 -1991, U95551)  
401 under the regulation of tetracycline controlled CMV promoter. The H133\_dSL $\alpha$  and H133\_dLa  
402 are derived from pH133 with either the SL $\alpha$  sequence (nt 1294 - 1322) or the La protein binding  
403 site (nt 1271 - 1294) deleted, respectively. For the luciferase-based plasmids, the HBsAg CDS was  
404 replaced with the Gaussia luciferase (Gluc) reporter gene to generate the construct H133\_Gluc. To  
405 make Gluc\_dHBx, the HBx coding sequence was deleted, while the Gluc\_rcSL $\alpha$  is derived from  
406 Gluc\_dHBx with an inverted SL $\alpha$  sequence.

407 Huh-7 cells were transfected with the HBsAg or luciferase reporter derived plasmids per  
408 manufacturer's instructions (Lipofectamine 3000, Invitrogen, MA, USA). Cells were treated with  
409 the indicated compounds for 5 days. Culture supernatants were used for HBsAg or luciferase  
410 measurement (Pierce Gaussia Luciferase Glow Assay Kit, ThermoFisher Scientific, Waltham,  
411 MA, USA). Cells were collected for HBV RNA transcript and cellular ribosomal RNA analysis  
412 by Northern blots.

### 413 **Infection of HepG2-hNTCP-C4 cells and primary human hepatocytes (PHH)**

414 HepG2-hNTCP-C4 cells and PHH (BioIVT, Westbury, NY, USA) were cultured in complete  
415 DMEM medium containing 2% DMSO overnight, infected with HBV at a MOI of 100-250  
416 GE/cell, and subsequently treated with compounds for 11-16 days with medium and compound  
417 treatments refreshed every 2-3 days. The supernatants were harvested for HBsAg and HBeAg  
418 analysis (ELISAs, International Immuno-Diagnostics, CA, USA). HBV DNA was extracted from  
419 cell lysates per manufacturer's instructions (Qiagen DNeasy 96 Blood and Tissue Kit, Qiagen,  
420 Hilden, Germany). HBV DNA was detected by qPCR using primers and probe as follows: 5'-  
421 GTCCTCAAAYTTGTCCTGG-3' (sense), TGAGGCATAGCAGCAGGA-3' (antisense), and  
422 Probe /56-FAM/CTGGATGTGTCT GCGGCGTTTTATCAT/36-TAMSp/.

#### 423 **Northern and Southern blots**

424 Northern and Southern blots were performed as described previously (44). Total intracellular RNA  
425 samples were separated in 1.5% agarose gels, transferred onto Hybond-XL membrane and probed  
426 with  $\alpha$ -<sup>32</sup>P-UTP (Perkin Elmer, CT, USA) labeled HBV plus-strand-specific riboprobe.  
427 Intracellular viral DNA was analyzed by Southern blot hybridization with an  $\alpha$ -<sup>32</sup>P-UTP labeled  
428 HBV minus-strand-specific riboprobe. Membranes were exposed to a phosphoimager screen and  
429 the signal was quantified using Image Studio software (LI-COR Biosciences, NE, USA).

#### 430 **Western blot**

431 HepG2.2.15 or HepG2-NTCP cells were lysed with Laemmli buffer (Bio-Rad, PA, USA). Cell  
432 lysates were separated with 12% precast polyacrylamide gels and Tris/Glycine/SDS running buffer  
433 (Bio-Rad). Following protein transfer, PVDF membranes were incubated with primary antibody  
434 followed by secondary antibody, developed with Clarity™ Western ECL Substrate (Bio-Rad) and  
435 imaged by the iBright Imaging Systems (ThermoFisher Scientific). The primary antibodies used

436 in the present study are listed as below, anti-HBc antibody (Dako cat. no. B0586, United  
437 Kingdom), anti-PAPD5 antibody (Atlas Antibodies cat. no. HPA042968, Bromma, Sweden), and  
438 anti-beta Actin antibody (Abcam cat. no. ab8227, Cambridge, United Kingdom).

#### 439 **Particle gel for viral nucleocapsid analysis**

440 A particle gel assay was carried out as described previously (44). Secreted viral particles and  
441 intracellular viral nucleocapsid from lysed HepG2.2.15 cells were fractionated through  
442 nondenaturing 1% agarose gel electrophoresis and blotted to a nitrocellulose filter. To detect HBV  
443 core antigens, membranes were probed with antibody recognizing core protein (Dako cat. no.  
444 B0586). For the detection of HBV DNA, the membrane was probed with an  $\alpha$ -<sup>32</sup>P-UTP labeled  
445 HBV minus-strand-specific riboprobe.

#### 446 **Encapsidated pgRNA**

447 HepG2.2.15 or HepAD38 (45) cell lysates were digested with micrococcal nuclease (20 U/ml) at  
448 37 °C for 30 min to remove unprotected nucleic acids. Core particles were precipitated with 35%  
449 PEG-8000 and the associated encapsidated pgRNA was extracted with TRI Reagent™ Solution  
450 (Invitrogen™, CA, USA).

#### 451 **Poly(A) tail-length analysis of HBV transcripts**

452 Poly(A) tails of HBV transcripts were measured with the Poly(A) Tail-Length Assay Kit  
453 (Thermofisher) as per manufacturer's instructions. Detailed methodology and data analysis are  
454 provided in the Supporting Information.

#### 455 **PAPD5 and PAPD7 ATP depletion assay**

456 Reactions were carried out in 10  $\mu$ l of the reaction mixture (12.5 nM of purified PAPD5 (186-518  
457 a.a.) or PAPD7 (226-558 a.a.) in a buffer containing 10 mM Tris-HCl (pH 8.0), 100 mM KCl,  
458 5mM MgCl<sub>2</sub>, 250 nM CALM1 (RNA substrate 5'- GCCUUUCAUCUCUAACUGCGAAAAA  
459 AAAAA -3'), 750 nM ATP, 0.1 mM EDTA, 1mM TCEP and 0.002% NP-40). Remaining ATP  
460 was readout after 3 h incubation using Kinase-Glo® Luminescent Kinase kit following  
461 manufacturer's instructions (Promega, WI, USA).

### 462 **In vivo antiviral activity in a mouse model of HBV**

463 Evaluation of *in vivo* antiviral efficacy using AAV-HBV-infected mouse experiments were  
464 conducted at Arbutus Biopharma (Burnaby, Canada) within a Canadian Council on Animal Care-  
465 accredited Animal Care and Use Program. Male C57BL/6J mice expressed an HBV genotype D  
466 variant from an AAV vector. In the assessment of antiviral activity in the adeno-associated viruses  
467 (AAV)-HBV-infected mice, statistically significant difference ( $p < 0.05$ ) from vehicle control was  
468 determined using one-way ANOVA (Dunn's multiple comparisons test). Detailed methodology  
469 including baseline HBV values are provided in the Supporting Information.

470

### 471 **Authors' contributions**

472 FL and MG conceived and designed the research. FL, ACHL, FG, ASK, HMS, AM, LB, XW, SC,  
473 SGK and AGC performed the research. All authors analyzed the data. FL, ACHL and MG wrote  
474 the paper, and AGC, DG, BDD, RR (designed plasmids), AL and MJS revised the paper.

475

476



477 **Acknowledgement**

478 We thank Ingrid Graves, Agnes Jarosz, Chris Pasetka and Alice Li for the analysis of *in vivo* data.

479 Thank Jorge Quintero for scaling up the production of *cmpdA*. Thank Tianlun Zhou for providing

480 HBsAg-encoded adenoviruses.

481

## 482   **References**

- 483   1.    Lok AS, Zoulim F, Dusheiko G, Chan HLY, Buti M, Ghany MG, Gaggar A, Yang JC, Wu  
484       G, Flaherty JF, Subramanian GM, Locarnini S, Marcellin P. 2020. Durability of Hepatitis  
485       B Surface Antigen Loss With Nucleotide Analogue and Peginterferon Therapy in Patients  
486       With Chronic Hepatitis B. *Hepatol Commun* 4:8-20.
- 487   2.    Bhattacharya D, Thio CL. 2010. Review of hepatitis B therapeutics. *Clin Infect Dis*  
488       51:1201-8.
- 489   3.    Lok AS, McMahon BJ, Aasld. 2004. [AASLD Practice Guidelines. Chronic hepatitis B:  
490       update of therapeutic guidelines]. *Rom J Gastroenterol* 13:150-4.
- 491   4.    Werle-Lapostolle B, Bowden S, Locarnini S, Wursthorn K, Petersen J, Lau G, Trepo C,  
492       Marcellin P, Goodman Z, Delaney WEt, Xiong S, Brosgart CL, Chen SS, Gibbs CS,  
493       Zoulim F. 2004. Persistence of cccDNA during the natural history of chronic hepatitis B  
494       and decline during adefovir dipivoxil therapy. *Gastroenterology* 126:1750-8.
- 495   5.    Kondo Y, Ninomiya M, Kakazu E, Kimura O, Shimosegawa T. 2013. Hepatitis B surface  
496       antigen could contribute to the immunopathogenesis of hepatitis B virus infection. *ISRN*  
497       *Gastroenterol* 2013:935295.
- 498   6.    Zhu D, Liu L, Yang D, Fu S, Bian Y, Sun Z, He J, Su L, Zhang L, Peng H, Fu YX. 2016.  
499       Clearing Persistent Extracellular Antigen of Hepatitis B Virus: An Immunomodulatory  
500       Strategy To Reverse Tolerance for an Effective Therapeutic Vaccination. *J Immunol*  
501       196:3079-87.
- 502   7.    Watanabe T, Sorensen EM, Naito A, Schott M, Kim S, Ahlquist P. 2007. Involvement of  
503       host cellular multivesicular body functions in hepatitis B virus budding. *Proc Natl Acad*  
504       *Sci U S A* 104:10205-10.
- 505   8.    Jiang B, Himmelsbach K, Ren H, Boller K, Hildt E. 2015. Subviral Hepatitis B Virus  
506       Filaments, like Infectious Viral Particles, Are Released via Multivesicular Bodies. *J Virol*  
507       90:3330-41.
- 508   9.    Ganem D, Prince AM. 2004. Hepatitis B virus infection--natural history and clinical  
509       consequences. *N Engl J Med* 350:1118-29.
- 510   10.   Hu J, Liu K. 2017. Complete and Incomplete Hepatitis B Virus Particles: Formation,  
511       Function, and Application. *Viruses* 9.
- 512   11.   Blumberg BS. 1977. Australia antigen and the biology of hepatitis B. *Science* 197:17-25.
- 513   12.   Reignat S, Webster GJ, Brown D, Ogg GS, King A, Seneviratne SL, Dusheiko G, Williams  
514       R, Maini MK, Bertoletti A. 2002. Escaping high viral load exhaustion: CD8 cells with  
515       altered tetramer binding in chronic hepatitis B virus infection. *J Exp Med* 195:1089-101.
- 516   13.   Zhang Z, Zhang JY, Wherry EJ, Jin B, Xu B, Zou ZS, Zhang SY, Li BS, Wang HF, Wu H,  
517       Lau GK, Fu YX, Wang FS. 2008. Dynamic programmed death 1 expression by virus-  
518       specific CD8 T cells correlates with the outcome of acute hepatitis B. *Gastroenterology*  
519       134:1938-49, 1949 e1-3.
- 520   14.   Fisicaro P, Valdatta C, Massari M, Loggi E, Biasini E, Sacchelli L, Cavallo MC, Silini EM,  
521       Andreone P, Missale G, Ferrari C. 2010. Antiviral intrahepatic T-cell responses can be  
522       restored by blocking programmed death-1 pathway in chronic hepatitis B.  
523       *Gastroenterology* 138:682-93, 693 e1-4.

- 524 15. Kim JH, Ghosh A, Ayithan N, Romani S, Khanam A, Park JJ, Rijnbrand R, Tang L, Sofia  
525 MJ, Kottlil S, Moore CB, Poonia B. 2020. Circulating serum HBsAg level is a biomarker  
526 for HBV-specific T and B cell responses in chronic hepatitis B patients. *Sci Rep* 10:1835.
- 527 16. Burton AR, Pallett LJ, McCoy LE, Suveizdyte K, Amin OE, Swadling L, Alberts E,  
528 Davidson BR, Kennedy PT, Gill US, Mauri C, Blair PA, Pelletier N, Maini MK. 2018.  
529 Circulating and intrahepatic antiviral B cells are defective in hepatitis B. *J Clin Invest*  
530 128:4588-4603.
- 531 17. Salimzadeh L, Le Bert N, Dutertre CA, Gill US, Newell EW, Frey C, Hung M, Novikov  
532 N, Fletcher S, Kennedy PT, Bertoletti A. 2018. PD-1 blockade partially recovers  
533 dysfunctional virus-specific B cells in chronic hepatitis B infection. *J Clin Invest* 128:4573-  
534 4587.
- 535 18. Fang Z, Li J, Yu X, Zhang D, Ren G, Shi B, Wang C, Kosinska AD, Wang S, Zhou X,  
536 Kozlowski M, Hu Y, Yuan Z. 2015. Polarization of Monocytic Myeloid-Derived  
537 Suppressor Cells by Hepatitis B Surface Antigen Is Mediated via ERK/IL-6/STAT3  
538 Signaling Feedback and Restrains the Activation of T Cells in Chronic Hepatitis B Virus  
539 Infection. *J Immunol* 195:4873-83.
- 540 19. Huang J, Liang TJ. 1993. A novel hepatitis B virus (HBV) genetic element with Rev  
541 response element-like properties that is essential for expression of HBV gene products.  
542 *Mol Cell Biol* 13:7476-86.
- 543 20. Huang ZM, Yen TS. 1995. Role of the hepatitis B virus posttranscriptional regulatory  
544 element in export of intronless transcripts. *Mol Cell Biol* 15:3864-9.
- 545 21. Huang ZM, Yen TS. 1994. Hepatitis B virus RNA element that facilitates accumulation of  
546 surface gene transcripts in the cytoplasm. *J Virol* 68:3193-9.
- 547 22. Heise T, Sommer G, Reumann K, Meyer I, Will H, Schaal H. 2006. The hepatitis B virus  
548 PRE contains a splicing regulatory element. *Nucleic Acids Res* 34:353-63.
- 549 23. Smith GJ, 3rd, Donello JE, Luck R, Steger G, Hope TJ. 1998. The hepatitis B virus post-  
550 transcriptional regulatory element contains two conserved RNA stem-loops which are  
551 required for function. *Nucleic Acids Res* 26:4818-27.
- 552 24. Schwalbe M, Ohlenschlager O, Marchanka A, Ramachandran R, Hafner S, Heise T,  
553 Gorlach M. 2008. Solution structure of stem-loop alpha of the hepatitis B virus post-  
554 transcriptional regulatory element. *Nucleic Acids Res* 36:1681-9.
- 555 25. Li Y, Huang T, Zhang X, Wan T, Hu J, Huang A, Tang H. 2009. Role of glyceraldehyde-  
556 3-phosphate dehydrogenase binding to hepatitis B virus posttranscriptional regulatory  
557 element in regulating expression of HBV surface antigen. *Arch Virol* 154:519-24.
- 558 26. Tang H, Huang Y, Chen J, Yu C, Huang AL. 2008. Cellular protein TIA-1 regulates the  
559 expression of HBV surface antigen by binding the HBV posttranscriptional regulatory  
560 element. *Intervirology* 51:203-9.
- 561 27. Ehlers I, Horke S, Reumann K, Rang A, Grosse F, Will H, Heise T. 2004. Functional  
562 characterization of the interaction between human La and hepatitis B virus RNA. *J Biol*  
563 *Chem* 279:43437-47.
- 564 28. Heise T, Guidotti LG, Chisari FV. 1999. La autoantigen specifically recognizes a predicted  
565 stem-loop in hepatitis B virus RNA. *J Virol* 73:5767-76.
- 566 29. Zang WQ, Li B, Huang PY, Lai MM, Yen TS. 2001. Role of polypyrimidine tract binding  
567 protein in the function of the hepatitis B virus posttranscriptional regulatory element. *J*  
568 *Virol* 75:10779-86.

- 569 30. Chi B, Wang K, Du Y, Gui B, Chang X, Wang L, Fan J, Chen S, Wu X, Li G, Cheng H.  
570 2014. A Sub-Element in PRE enhances nuclear export of intronless mRNAs by recruiting  
571 the TREX complex via ZC3H18. *Nucleic Acids Res* 42:7305-18.
- 572 31. Hyrina A, Jones C, Chen D, Clarkson S, Cochran N, Feucht P, Hoffman G, Lindeman A,  
573 Russ C, Sigoillot F, Tsang T, Uehara K, Xie L, Ganem D, Holdorf M. 2019. A Genome-  
574 wide CRISPR Screen Identifies ZCCHC14 as a Host Factor Required for Hepatitis B  
575 Surface Antigen Production. *Cell Rep* 29:2970-2978 e6.
- 576 32. Kim D, Lee YS, Jung SJ, Yeo J, Seo JJ, Lee YY, Lim J, Chang H, Song J, Yang J, Kim  
577 JS, Jung G, Ahn K, Kim VN. 2020. Viral hijacking of the TENT4-ZCCHC14 complex  
578 protects viral RNAs via mixed tailing. *Nat Struct Mol Biol* doi:10.1038/s41594-020-0427-  
579 3.
- 580 33. Mueller H, Wildum S, Luangsay S, Walther J, Lopez A, Tropberger P, Ottaviani G, Lu W,  
581 Parrott NJ, Zhang JD, Schmucki R, Racek T, Hoflack JC, Kueng E, Point F, Zhou X,  
582 Steiner G, Lutgehetmann M, Rapp G, Volz T, Dandri M, Yang S, Young JAT, Javanbakht  
583 H. 2018. A novel orally available small molecule that inhibits hepatitis B virus expression.  
584 *J Hepatol* 68:412-420.
- 585 34. Han X, Zhou C, Jiang M, Wang Y, Wang J, Cheng Z, Wang M, Liu Y, Liang C, Wang J,  
586 Wang Z, Weikert R, Lv W, Xie J, Yu X, Zhou X, Luangsay S, Shen HC, Mayweg AV,  
587 Javanbakht H, Yang S. 2018. Discovery of RG7834: The First-in-Class Selective and  
588 Orally Available Small Molecule Hepatitis B Virus Expression Inhibitor with Novel  
589 Mechanism of Action. *J Med Chem* 61:10619-10634.
- 590 35. Zhou T, Block T, Liu F, Kondratowicz AS, Sun L, Rawat S, Branson J, Guo F, Steuer HM,  
591 Liang H, Bailey L, Moore C, Wang X, Cuconatti A, Gao M, Lee ACH, Harasym T, Chiu  
592 T, Gotchev D, Dorsey B, Rijnbrand R, Sofia MJ. 2018. HBsAg mRNA degradation  
593 induced by a dihydroquinolizinone compound depends on the HBV posttranscriptional  
594 regulatory element. *Antiviral Res* 149:191-201.
- 595 36. Mueller H, Lopez A, Tropberger P, Wildum S, Schmalzer J, Pedersen L, Han X, Wang Y,  
596 Ottosen S, Yang S, Young JAT, Javanbakht H. 2019. PAPD5/7 Are Host Factors That Are  
597 Required for Hepatitis B Virus RNA Stabilization. *Hepatology* 69:1398-1411.
- 598 37. Wilson T, Treisman R. 1988. Removal of poly(A) and consequent degradation of c-fos  
599 mRNA facilitated by 3' AU-rich sequences. *Nature* 336:396-9.
- 600 38. Garneau NL, Wilusz J, Wilusz CJ. 2007. The highways and byways of mRNA decay. *Nat*  
601 *Rev Mol Cell Biol* 8:113-26.
- 602 39. Yamashita A, Chang TC, Yamashita Y, Zhu W, Zhong Z, Chen CY, Shyu AB. 2005.  
603 Concerted action of poly(A) nucleases and decapping enzyme in mammalian mRNA  
604 turnover. *Nat Struct Mol Biol* 12:1054-63.
- 605 40. Lok AS, Zoulim F, Dusheiko G, Ghany MG. 2017. Hepatitis B cure: From discovery to  
606 regulatory approval. *J Hepatol* 67:847-861.
- 607 41. Wooddell CI, Yuen MF, Chan HL, Gish RG, Locarnini SA, Chavez D, Ferrari C, Given  
608 BD, Hamilton J, Kanner SB, Lai CL, Lau JYN, Schlupe T, Xu Z, Lanford RE, Lewis DL.  
609 2017. RNAi-based treatment of chronically infected patients and chimpanzees reveals that  
610 integrated hepatitis B virus DNA is a source of HBsAg. *Sci Transl Med* 9.
- 611 42. Sun L, Zhang F, Guo F, Liu F, Kulsuptrakul J, Puschnik A, Gao M, Rijnbrand R, Sofia M,  
612 Block T, Zhou T. 2020. The dihydroquinolizinone compound RG7834 inhibits the  
613 polyadenylase function of PAPD5/7 and accelerates the degradation of matured HBV  
614 surface protein mRNA. *Antimicrob Agents Chemother* doi:10.1128/AAC.00640-20.

- 615 43. Sells MA, Chen ML, Acs G. 1987. Production of hepatitis B virus particles in Hep G2 cells  
616 transfected with cloned hepatitis B virus DNA. *Proc Natl Acad Sci U S A* 84:1005-9.
- 617 44. Campagna MR, Liu F, Mao R, Mills C, Cai D, Guo F, Zhao X, Ye H, Cuconati A, Guo H,  
618 Chang J, Xu X, Block TM, Guo JT. 2013. Sulfamoylbenzamide derivatives inhibit the  
619 assembly of hepatitis B virus nucleocapsids. *J Virol* 87:6931-42.
- 620 45. Ladner SK, Otto MJ, Barker CS, Zaifert K, Wang GH, Guo JT, Seeger C, King RW. 1997.  
621 Inducible expression of human hepatitis B virus (HBV) in stably transfected  
622 hepatoblastoma cells: a novel system for screening potential inhibitors of HBV replication.  
623 *Antimicrob Agents Chemother* 41:1715-20.

624

625

626

627

628

## 629 **Figure legends**

630 **Fig. 1. AB-452 interferes with multiple steps of HBV life cycle.** HepG2.2.15 cells were treated  
631 with DMSO, ETV (1  $\mu$ M), GLS-4 (1  $\mu$ M), cmpdA (1  $\mu$ M), or AB-452 (70 nM) for 6 days. HBV  
632 replication intermediates and host markers were analyzed by gel-based analysis. Encapsidated  
633 pgRNA (capsid pgRNA) was quantitated by qRT-PCR and expressed as percentage of untreated  
634 controls (DMSO).

635

636 **Fig. 2. AB-452 promotes HBV RNA degradation through inhibiting PAPD5 and PAPD7**  
637 **enzymatic activities and blockage of guanosine incorporation into viral RNA poly(A) tails.**

638 HepAD38 cells were cultured in the absence of Tet to promote HBV transcription, and the capsid  
639 inhibitor GLS4 was included to prevent pgRNA encapsidation for 6 days. On day 7, Tet was added  
640 back with media containing either DMSO or AB-452 (70 nM), and cells were harvested either

641 before treatment (time 0 h) or at 2, 4, 8, and 16 h post-treatment. (A) HBV mRNA was analyzed  
642 by Northern blot, with ribosomal RNAs as loading control. (B) Decay rate of HBV pgRNA in the  
643 presence or absence of AB-452, with calculated  $T_{1/2}$  labeled for each treatment ( $n = 2$ ). (C) Effect  
644 of AB-452, RG7834, and AB-169451 on the enzymatic activity of PAPD5 and PAPD7. Half-  
645 maximal inhibition ( $IC_{50}$ ) for the three compounds were determined based on the dose response  
646 curves and reported in the table below each figure. Mean values ( $\pm$  standard derivations) are  
647 presented from duplicate experiments. (D) HepAD38 cells were treated with AB-452 (70 nM) for  
648 4 h prior to isolation of intracellular RNA. HBV RNA poly(A) tails were converted into cDNA  
649 and amplified for sequencing and tail lengths analysis. (E) Frequency of non-A modifications (C,  
650 cytidylation, G/GG, guanylation; U, uridylation) was analyzed within the HBV poly(A) tails from  
651 cells treated with or without AB-452 (70 nM). Guanosines were often clustered; tandem GG  
652 analysis was made to reflect this observation. (F) Determination of G nucleotide frequency located  
653 within the HBV poly(A) tails from cells treated with or without AB-452 (70 nM). The numbers of  
654 guanylated tail reads and total tail reads obtained from the NSG sequencing were indicated under  
655 each sample. The frequency of guanylated tails of viral mRNAs was calculated for poly(A) tail  
656 length of  $\geq 10$  nt.

657 **Fig. 3. SL $\alpha$  sequence within the HBV PRE $\alpha$  sub-element is essential for RNA stability and**  
658 **AB-452 activity.** Evaluation of AB-452 against H133 and Gaussia luciferase (Gluc) encoded  
659 plasmids containing either wildtype HBV PRE or inversion-derived mutants. (A) Schematic  
660 representation of H133 and the Gluc-encoded constructs. Huh-7 cells were transfected with each  
661 of these plasmids and susceptibility to AB-452 was evaluated by monitoring HBsAg or Gluc  
662 activity. The inactive enantiomer ARB-169451 was included as a negative control. Mean values  
663 ( $\pm$  standard derivations) are presented from triplicate experiments. (B) The HBx deletion variants



664 containing either the WT SL $\alpha$  (Gluc\_dHBx) or the inverted SL $\alpha$  (Gluc\_rcSL $\alpha$ ) sequence were  
665 transfected into Huh-7 cells, which were treated with DMSO, AB-452 (100 nM) or ARB-169451  
666 (100 nM) for 5 days. Effect of AB-452 against HBV RNA was analyzed by Northern blot with  
667 ribosomal RNAs as loading control. (C) Kinetics of HBV RNA degradation in Huh-7 cells  
668 transfected with Gluc\_dHBx or Gluc\_rcSL $\alpha$  plasmids. Transcription proceeded for 2 days prior to  
669 the addition of tetracycline with or without AB-452 (100 nM). Cells were harvested before  
670 treatment (time 0 h) and at 4, 8, and 16 h post treatment. HBV RNA decays were analyzed by  
671 qRT-PCR. Data and error bars represent mean % HBV RNA and standard deviations relative to  
672 time 0 of each condition from at least three independent experiments.

673 **Fig. 4. SL $\alpha$  determines HBV RNA poly(A) tail integrity and stability.** Evaluation of the SL $\alpha$   
674 sequence on sensitivity towards AB-452 and HBV RNA stability. (A) H133\_dSL $\alpha$  and H133\_dLa  
675 were mutants with either SL $\alpha$  (nt 1294-1322) or La binding site (nt 1271-1294) deleted. Huh-7  
676 cells were transfected with H133, H133\_dLa or H133\_dSL $\alpha$  plasmids and treated with AB-452  
677 for 5 days. The activities of AB-452 and ARB-169451 against HBsAg production were determined  
678 and its EC<sub>50</sub> values summarized in the table below the schematic representation. Mean values ( $\pm$   
679 standard derivations) are determined from triplicate experiments. (B) Levels of HBV sRNA from  
680 transfected cells treated with ETV (1  $\mu$ M), AB-452 (100 nM), and 169451 (100 nM) were analyzed  
681 by Northern blot. (C) HBV sRNA was quantitated by qRT-PCR assay, with calculated decay T<sub>1/2</sub>  
682 labeled under each treatment ( $n = 3$ ). (D) HBV RNA poly(A) tails were sequenced and analyzed  
683 for frequency of tail lengths from cells transfected with the H133 or H133\_dSL $\alpha$  plasmids treated  
684 with or without AB-452 (100 nM). (E) Frequency of non-A modifications (G, guanylation; U,  
685 uridylation; C, cytidylation) within the ploy(A) tail of HBV mRNAs were analyzed. Tandem GG  
686 analysis was performed to analyze clustered guanosines. (F) The frequency of guanylated tails of

687 viral mRNAs was calculated with a poly(A) tail length of  $\geq 10$  nt. The numbers of guanylated tail  
688 reads and total tail reads obtained from the NSG sequencing were indicated under each sample.

689 **Fig. 5. Knockout of *PAPD5/7* and *ZCCHC14* destabilizes and desensitizes HBV RNA to AB-**  
690 **452.** *PAPD5*, *PAPD7*, *ZCCHC14*, or both *PAPD5* and *PAPD7* were knocked out in HepG2-NTCP  
691 cells by CRISPR-Cas9 and gRNAs designed to target these genes. (A) Cell proliferation analysis  
692 of *PAPD5*, *PAPD7* and *Z14* KO or WT clones was analyzed. Percentage cell growth relative to  
693 the WT parent HepG2-NTCP cells was determined for each tested clone. (B) Adenoviruses  
694 carrying HBsAg coding sequence were used to transduce either WT, *PAPD5*, *PAPD7* or  
695 *ZCCHC14* KO cell clones, extracellular HBsAg was measured on day 5 post transduction.  
696 Percentage of HBsAg relative to the WT parent HepG2-NTCP cells was determined. (C) HepG2-  
697 NTCP cells were infected with HBV inoculum. HBsAg, HBeAg and HBV DNA were measured  
698 on day 9 post infection in the KO clones and normalized to the WT parent cells. (D) AB-452  
699 activity of HBsAg inhibition was evaluated in the *PAPD5/7* single or double KO and *ZCCHC14*  
700 KO clones infected with adenoviruses. (E-G) AB-452 antiviral activity was evaluated in HBV  
701 infected HepG2-NTCP clones. (H) HBV sRNA was analyzed by Northern Blot in the *PAPD5/7*  
702 single or double KO and *ZCCHC14* KO cell clones treated with and without AB-452 for 5 days.  
703 (I) HBV sRNA poly(A) tails were sequenced for the analysis of tail lengths and (J) guanylation  
704 incorporation frequency. The Mean values and standard derivations were plotted at least from  
705 duplicate experiments for the Figs. A-G.

706 **Fig. 6.** A proposed model illustrating the interplay between HBV RNA cis-elements and the host  
707 factors *PAPD5* and *PAPD7* in maintaining HBV RNA integrity and stability.

708



## 709 **Supporting information**

710 **Fig. S1. Antiviral activity of AB-452 in an AAV-HBV-transduced mouse model.** Animals  
711 received AB-452 at 0.1, 0.3, 1 mg/kg or vehicle orally twice daily for 7 days. Effect of AB-452 on  
712 the production of (A) serum HBsAg, (B) serum HBV DNA, (C) intrahepatic HBsAg, (D) total  
713 HBV RNA and (E) 3.5 kb HBV pgRNA on day 7 post-treatment. (F) Effect of AB-452 on body  
714 weight through the 7-day treatment. Data represent group mean ( $n = 5$ )  $\pm$  SD. Statistically  
715 significant difference ( $p < 0.05$ ) from vehicle control was determined using one-way ANOVA  
716 (Dunn's multiple comparisons test) and is denoted by an asterisk (\*).

717 **Fig. S2. Chemical structure of the HBV capsid inhibitor, cmpdA.**

718 **Fig. S3. AB-452 reduces HBV RNA levels dose- and time-dependently.** (A) Levels of  
719 intracellular pgRNA and sRNA in HepG2.2.15 cells treated with increasing concentrations of AB-  
720 452 (0.14 to 1000 nM) for 48 h. (B) Time course analysis of HBV RNAs from cells treated with  
721 and without 70 nM AB-452. Total intracellular RNA was extracted from cells harvested at 4, 8,  
722 12, 24 and 48 h time points post-treatment. HBV pgRNA and sRNA were analyzed by Northern  
723 blotting with ribosomal RNAs as loading control.

724 **Fig. S4. HBV RNA poly(A) tail is shortened by AB-452 treatment.** Total RNA was tagged with  
725 a poly-G/I tail at the 3' end and reverse transcribed by poly-G/I specific primer. Both HBV and  $\beta$ -  
726 actin mRNA poly(A) tails were specifically amplified using one gene specific primer and the  
727 universal primer that anneals to the G/I tail. The obtained amplicon product was resolved on a 2%  
728 agarose gel. Gene specific PCR (GSP) was used as loading control. The poly(A) tail length of  $\beta$ -  
729 actin mRNA served as the negative control as  $\beta$ -actin mRNA was not affected by AB-452  
730 treatment.

731 **Fig. S5. SL $\alpha$  deletion reduces sensitivity to AB-452.** H133 and H133\_dSL $\alpha$  were transfected  
732 into Huh-7 cells and treated with either ETV (1  $\mu$ M), AB-452 (0.1  $\mu$ M), or ARB-169451 (0.1  $\mu$ M)  
733 for 5 days. Effect of compounds on HBV was monitored by measuring levels of HBsAg in  
734 supernatant and normalized to untreated controls (DMSO). Data represent average values  $\pm$   
735 standard deviations from at least three independent experiments.

736 **Fig. S6. Shortening of HBV RNA poly(A) tails by AB-452 treatment or SL $\alpha$  deletion.** Total  
737 RNA was tagged with a poly-G/I tail at the 3' end and reverse transcribed (RT) using a primer  
738 specific to the poly-G/I tail. Both HBV and  $\beta$ -actin mRNA poly(A) tails were amplified using a  
739 gene specific primer and a universal primer that anneals to the G/I tail. The obtained amplicons  
740 were resolved in a 2 % agarose gel. Gene specific PCR (GSP) was used as loading control. The  
741 poly(A) tail length of  $\beta$ -actin mRNA served as the negative control as  $\beta$ -actin mRNA was not  
742 affected by AB-452 treatment. \* labels the potential read-throughs.

743 **Fig. S7. Confirmation of the *PAPD5*, *PAPD7* and *ZCCHC14* CRISPR-Cas9 mediated**  
744 **knockouts by DNA sequencing.** (A) Insertion-deletion mutations (INDELs) are annotated with  
745 the bps of insertion (+) or deletion (-) on alleles, in which "/" is used to separate INDELs among  
746 different alleles. The regions targeted by gRNAs are highlighted in black. INDELs are detected by  
747 sequencing trace analysis with CAT tool (CRISPR analysis tool). (B) *PAPD5* and *ZCCHC14* were  
748 detected with the indicated antibodies in the Western blots. The \* asterisk indicates a cross-reacting  
749 band.

750 **Fig. S8. Knockout of *PAPD5/7* and *ZCCHC14* shortened and desensitized HBV RNA poly(A)**  
751 **tail to AB-452.** The poly(A) tail length of HBV sRNA was measured in the *PAPD5/7* single or  
752 double KO and *ZCCHC14* KO cell clones treated with and without AB-452 for 5 days. Total RNA

753 was tagged with a poly-G/I tail at the 3' end and reverse transcribed (RT) using a primer specific  
754 to the poly-G/I tail. Both HBV and  $\beta$ -actin mRNA poly(A) tails were amplified using a gene  
755 specific primer and a universal primer that anneals to the G/I tail. The obtained amplicons were  
756 resolved in a 2 % agarose gel. Gene specific PCR (GSP) was used as loading control. The poly(A)  
757 tail length of  $\beta$ -actin mRNA served as the negative control as  $\beta$ -actin mRNA was not affected by  
758 AB-452 treatment.

759 **Fig. S9. PAPD5 is more efficient than PAPD7 to extend poly(A) tail.** Processivity of PAPD5  
760 and PAPD7 poly(A) extension was evaluated in the enzymatic assay in the time course studies.  
761 Compared to the PAPD7, PAPD5 was more efficient to extend poly(A) tail on the RNA substrate  
762 as demonstrated by measuring the remaining ATP in the assay. It is the representative result of two  
763 repeated experiments with different time points selected.

**Fig. 1.**

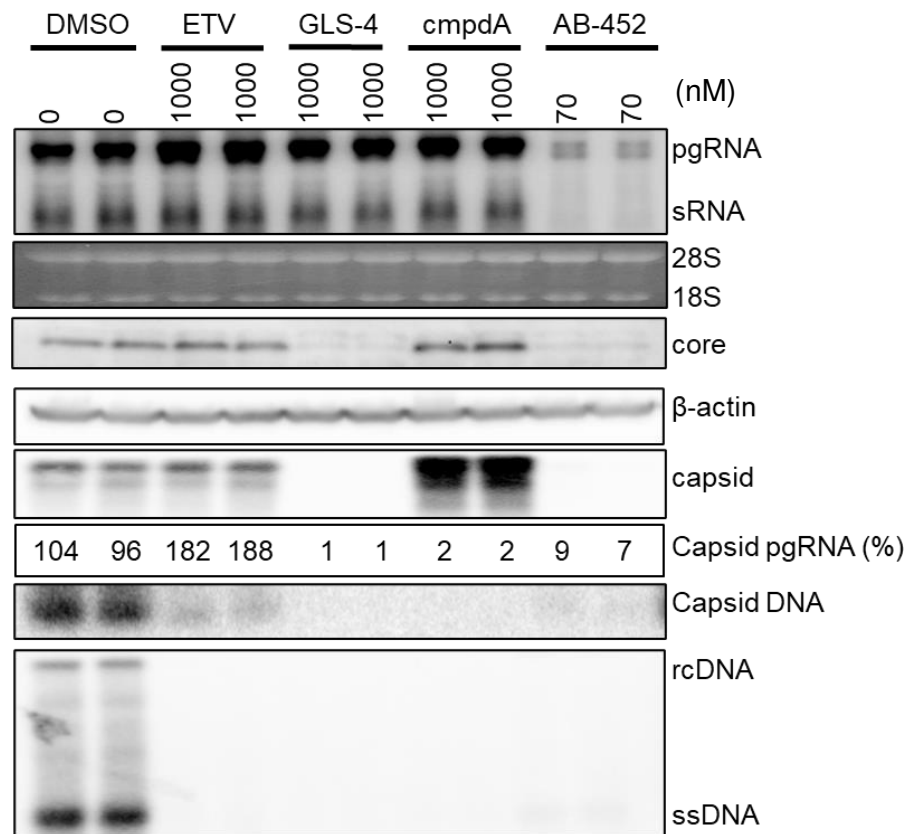

**Fig. 2.**

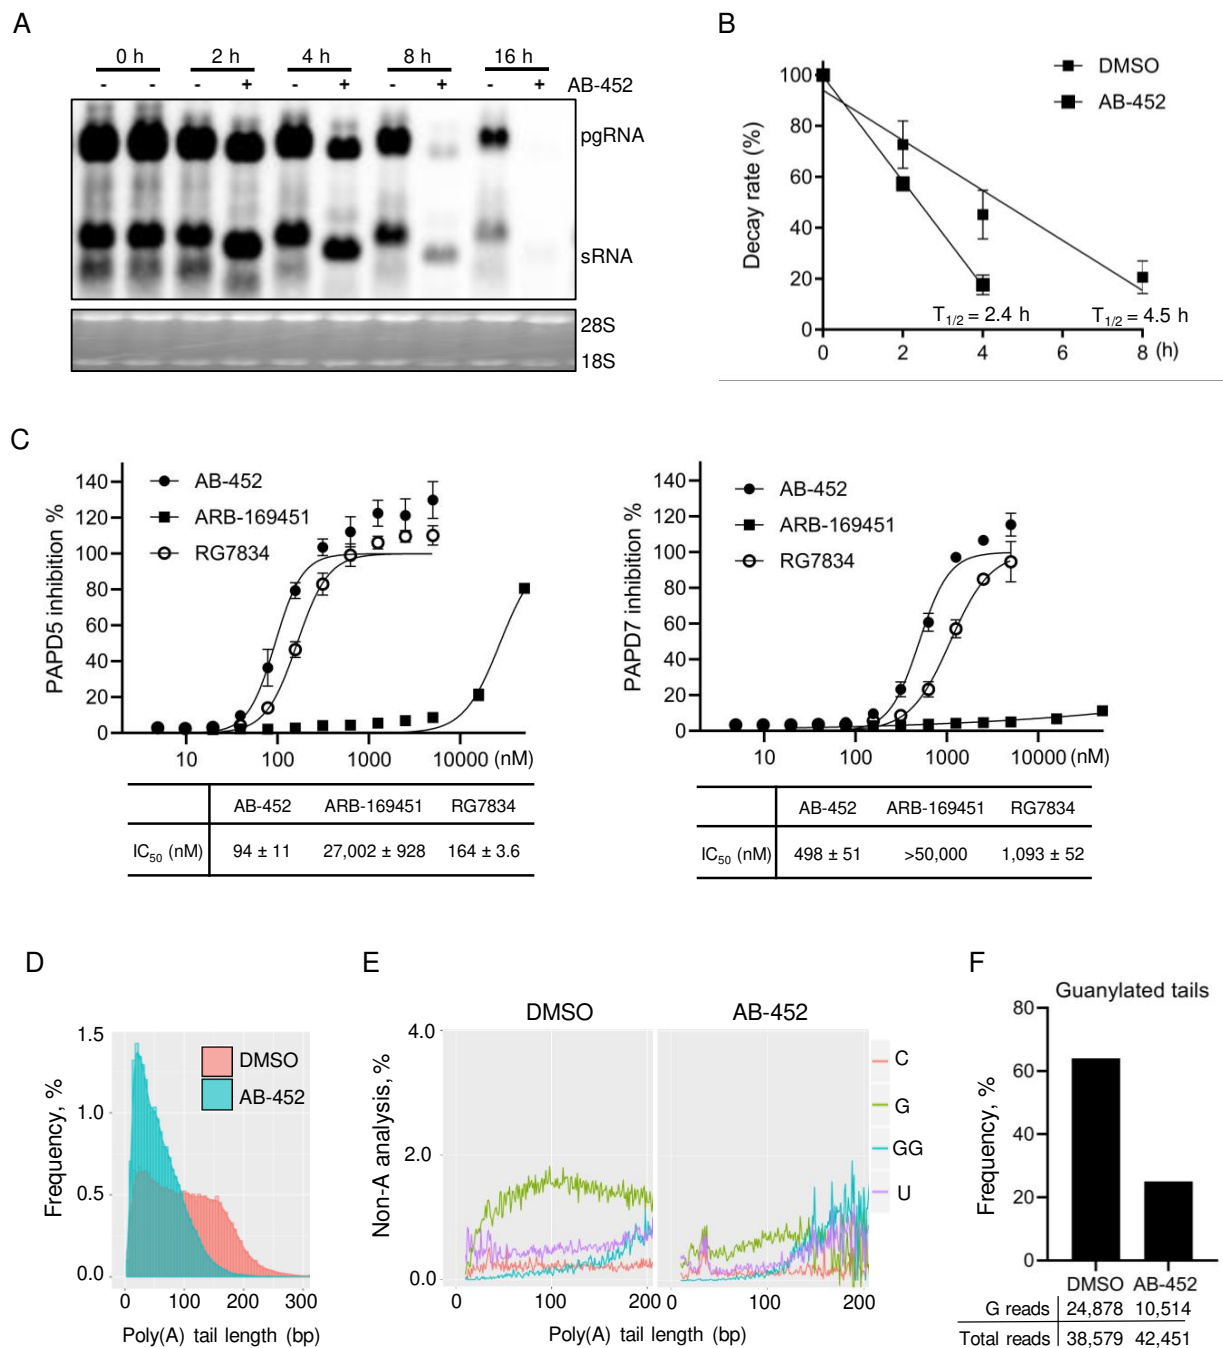

**Fig. 3.**

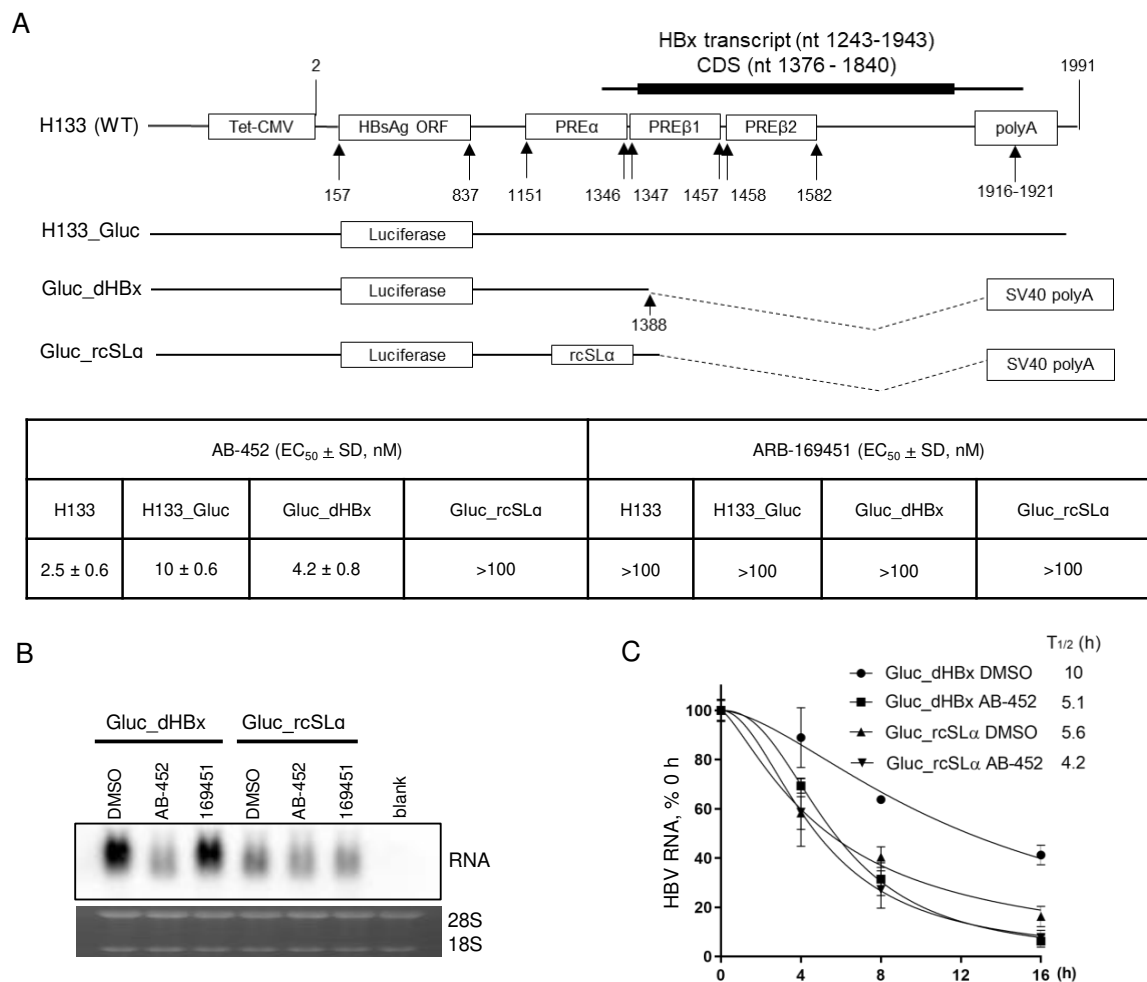

## Fig. 4.

A

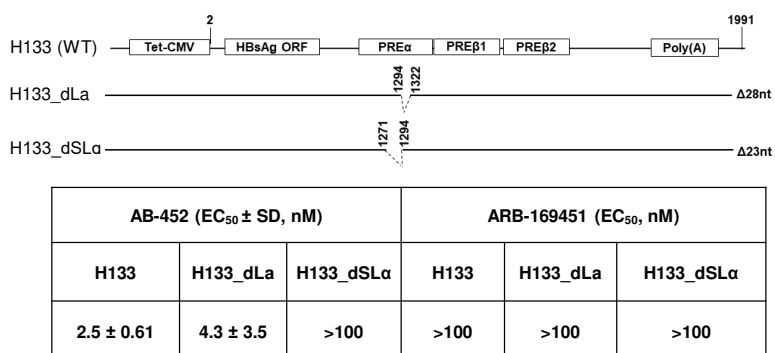

B

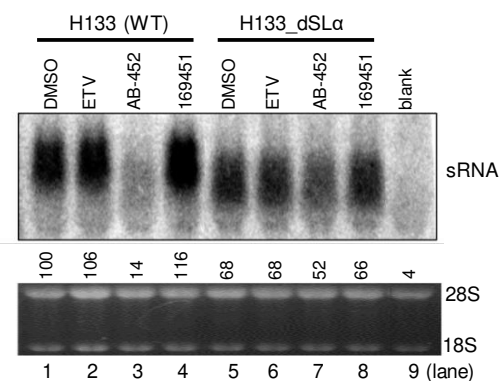

C

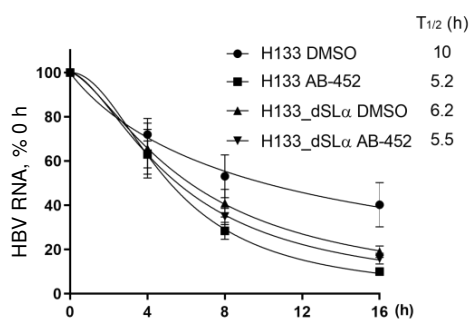

D

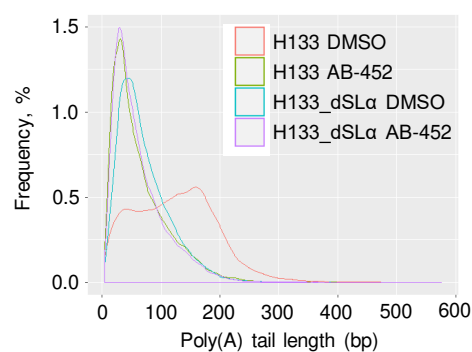

E

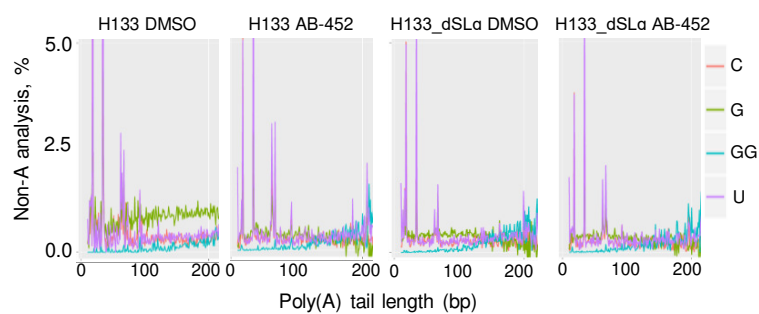

F

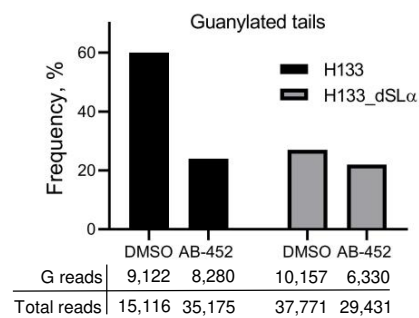

**Fig. 5.**

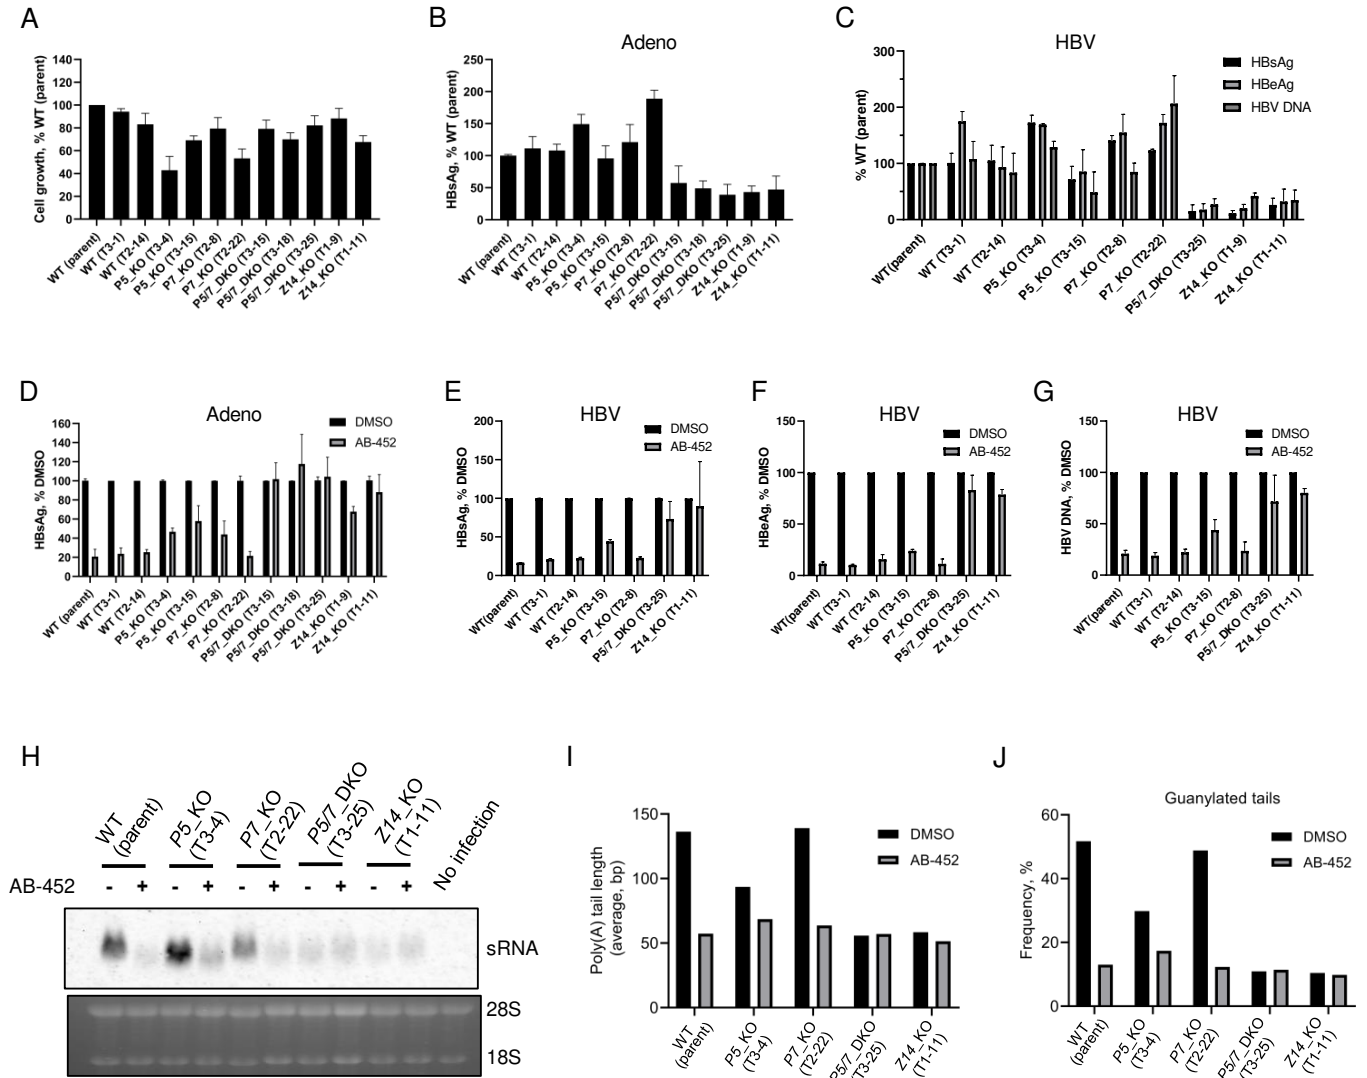



**Fig. 6.**

**Working Model**

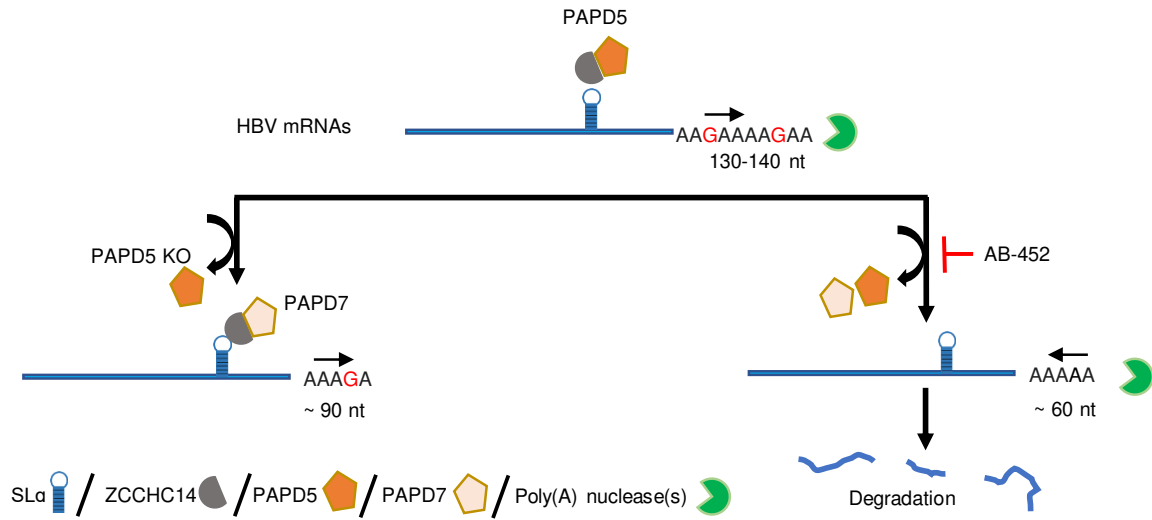

Source: https://biorxiv.org/content/10.1101/2021.04.12.439580v1.full.pdf
